# Supplementary material for: Reliability of left atrial strain reference values: A 3D echocardiographic study
Source: PLoS One. 2021 Apr 14;16(4):e0250089. doi: 10.1371/journal.pone.0250089 (PMC8046190; doi:10.1371/journal.pone.0250089)
Supplement: S3 Data — (XLSX) [file pone.0250089.s003.xlsx]

## Sheet: LA strain 5.22.2019
name	age	sex	BSA	HR	SBP	DBP	IQ score	LA IQ	frame rate	LAL4Cmax	LAL4Cmin	LAVmax4C	LAVmin4C	LAL2Cmax	LAL2Cmin	2DLALmax	2DLALmin	4CLALSendo	2CLALSendo	BipLALSendo	4CLALSmid	2CLALSmid	BipLALSmid
WASE301	25	male	1.78	58	133	64	7	poor	56.7	4.47	3.89	26.46	13.81	3.32	2.27	3.895	3.08	17.6	32.3	24.95	14.1	27	20.55
WASE302	27	male	1.86	40	135	68	11.5	good	60.8	5.26	4.11	67.44	34.19	4.88	3.93	5.07	4.02	30.6	35.9	33.25	27.8	29.8	28.8
WASE303	28	male	1.97	70	139	81	10.5	good	65.2	5.06	4.25	37.71	27.26	4	2.88	4.53	3.565	30.7	30.4	30.55	27	25.3	26.15
WASE304	41	male	1.94	88	131	76	8.5	so so	56.9	4.83	3.47	41.49	8.85	4.57	3.44	4.7	3.455	31.5	42	36.75	27	34.9	30.95
WASE305	32	male	1.8	90	128	90	9.5	so so	65.2	4.33	3.74	34.33	19.04	4.5	3.33	4.415	3.535	35.1	41.3	38.2	31.3	35.2	33.25
WASE306	34	male	1.76	61	136	85	8.5	so so	56.7	4.85	3.56	28.94	9.8	3.11	1.69	3.98	2.625	44.3	66.9	55.6	39	55	47
WASE307	28	male	1.71	85	135	78	9.5	so so	53.3	3.67	0.81	20.78	6.81	2.38	1.58	3.025	1.195	41.3	56.8	49.05	33.8	42.5	38.15
WASE308	35	male	1.97	73	138	75	8.5	so so	53.3	5.15	3.74	43.29	20.62	5.09	3.7	5.12	3.72	37.4	45	41.2	32.9	36.6	34.75
WASE310	58	male	1.94	56	113	78	10	so so	53.3	4.52	3.07	35.99	12.74	4.27	3.04	4.395	3.055	30.7	43.9	37.3	28.1	35.7	31.9
WASE321	32	male	1.81	72	128	73	12	good	56.9	5.58	4.04	36.23	14.59	4.02	3.02	4.8	3.53	42.3	47.3	44.8	34.5	40.2	37.35
WASE322	57	male	1.7	69	133	84	9.5	so so	56.9	6.33	5.32	52.1	25.33	4.57	3.98	5.45	4.65	17.4	31.9	24.65	15.9	27.2	21.55
WASE323	56	female	1.44	68	135	80	10	so so	65.2	4.76	3.43	42.67	29.69	4.1	2.62	4.43	3.025	29.2	39.4	34.3	27	35.7	31.35
WASE325	41	male	1.87	49	116	76	5.5	extremely poor	60.8	4.38	3.47	24.59	12.61	4.78	3.7	4.58	3.585	25.6	21.5	23.55	22.8	19	20.9
WASE326	31	male	1.77	63	135	74	10.5	good	53.3	5.56	4.14	58.92	27.97	4.78	3.77	5.17	3.955	18.8	29.6	24.2	17.1	24.1	20.6
WASE327	26	female	1.6	50	130	69	10.5	good	65.2	5.11	4.24	54.58	22.42	4.64	3.23	4.875	3.735	36.3	52.9	44.6	31.5	46.1	38.8
WASE328	38	male	1.81	50	133	71	11	good	65.2	5.21	3.95	45.13	16.05	4.75	3.77	4.98	3.86	28.2	33.7	30.95	25.8	29.3	27.55
WASE329	66	female	1.44	62	134	81	11	good	65.2	5.6	4.38	58.69	32.33	4.33	3.58	4.965	3.98	26.5	41	33.75	23.7	37	30.35
WASE330	54	female	1.85	58	131	73	9	so so	65.2	6.01	4.65	67	26.02	4.19	3.53	5.1	4.09	30	46.5	38.25	28.5	38.5	33.5
WASE331	28	female	1.32	68	118	71	7	poor	65.2	3.59	2.3	18.26	7.87	2.81	1.74	3.2	2.02	37.8	45.5	41.65	34.5	38	36.25
WASE332	80	male	1.75	46	144	75	9.5	so so	60.8	5.15	4.15	77.63	39.82	5.2	4.18	5.175	4.165	23.6	31.5	27.55	21.7	27	24.35
WASE333	73	male	1.65	73	134	67	11	good	56.9	5.75	4.97	71.61	48.11	5.3	5.07	5.525	5.02	20.6	19.9	20.25	17.9	17.1	17.5
WASE334	71	female	1.47	73	146	68	7	poor	60.8	4.19	3.41	37.04	14.4	4.83	3.79	4.51	3.6	43.9	33.8	38.85	36.2	25.9	31.05
WASE335	50	male	1.84	81	133	80	7.5	poor	56.9	5.31	4.1	46.3	19.19	5.29	3.97	5.3	4.035	34.5	63.5	49	31.1	54	42.55
WASE338	56	female	1.53	52	138	77	9	so so	65.2	5.21	3.99	32.58	14.4	4.74	3.54	4.975	3.765	38.5	28.1	33.3	34.1	24.1	29.1
WASE339	48	male	1.92	64	136	76	10.5	good	53.3	5.37	4.11	38.93	15.89	5.31	3.73	5.34	3.92	39.4	28.9	34.15	36.1	24.4	30.25
WASE340	36	male	1.64	76	124	63	11.5	good	53.3	4.11	3.01	27.16	9.39	4.11	2.94	4.11	2.975	38.6	64.3	51.45	31.5	57.1	44.3
WASE341	45	female	1.33	72	117	59	10	so so	60.8	4.65	3.21	47.86	14.44	4.7	3.25	4.675	3.23	53.4	74.2	63.8	47.5	55.7	51.6
WASE342	40	male	1.94	68	131	68	10.5	good	53.3	5.16	3.79	46.75	17.57	5.09	3.76	5.125	3.775	34	49.7	41.85	29.9	42.2	36.05
WASE343	62	male	1.62	53	139	77	10.5	good	60.8	6.2	5.19	68.97	25.77	6.16	4.79	6.18	4.99	32.3	32.5	32.4	27	28.4	27.7
WASE344	66	female	1.47	58	134	61	10	so so	65.2	4.46	3.49	44.77	21.28	4.97	3.98	4.715	3.735	45.1	40.2	42.65	39.8	33.7	36.75
WASE345	80	male	1.78	55	141	77	7.5	poor	70.3	5.94	4.98	59.41	29.47	5.71	4.8	5.825	4.89	15.5	20.1	17.8	13.6	18.4	16
WASE346	72	female	1.42	75	137	70	7.5	poor	70.3	4.62	3.88	37.82	21.09	4.74	4.05	4.68	3.965	64.1	28.5	46.3	52.9	26.3	39.6
WASE347	47	female	1.65	62	129	69	9	so so	65.2	5.5	4.25	44.63	13.76	3.66	2.72	4.58	3.485	26.8	47.7	37.25	24.4	40.7	32.55
WASE348	56	female	1.4	59	134	86	5.5	extremely poor	70.3	4.37	3.87	33.69	21.23	4.44	4.14	4.405	4.005	36.4	31.3	33.85	31.5	26.5	29
WASE349	22	female	1.42	54	118	68	6.5	poor	65.2	4.03	2.78	28.15	12.96	4.16	3.31	4.095	3.045	45	55.7	50.35	38.9	46.7	42.8
WASE350	65	female	1.56	70	144	86	11	good	65.2	4.96	4.33	49.53	25.4	4.69	4.34	4.825	4.335	23.2	25.8	24.5	20.3	23	21.65
WASE351	71	male	1.76	60			11	good	60.8	5.17	4.63	68.22	37.12	5.4	4.89	5.285	4.76	14.5	24.8	19.65	12.8	21.7	17.25
WASE352	42	male	1.93	64	135	76	10	so so	60.8	4.73	3.79	43.63	16.25	4.72	3.71	4.725	3.75	26.3	31.9	29.1	23.1	26.3	24.7
WASE353	36	male	1.78	56	108	65	8	poor	65.2	4.48	4.43	27.54	14.07	3.29	1.8	3.885	3.115	40.5	43.9	42.2	34.5	36.2	35.35
WASE354	37	female	1.59	72	123	73	9	so so	70.3	5.46	4.19	62.78	22.21	4.17	2.25	4.815	3.22	35.1	87.7	61.4	31.6	71.5	51.55
WASE355	23	female	1.36	58	111	61	7.5	poor	65.2	4.21	2.88	21.41	11.22	3.94	2.62	4.075	2.75	42.4	63.9	53.15	40.2	58.4	49.3
WASE356	25	male	1.89	55	126	64	9.5	so so	70.3	5.45	4	42.32	19.24	4.35	2.97	4.9	3.485	36	40.9	38.45	30.7	32.6	31.65
WASE357	34	male	1.87	85	133	71	11.5	good	53.3	5	3.45	39.11	9.75	4.17	3.06	4.585	3.255	47.3	51.5	49.4	40.7	44.1	42.4
WASE358	33	male	1.62	68	120	82	11	good	53.3	5.15	4	34.32	16.08	4.53	3.51	4.84	3.755	37.5	43.6	40.55	31.5	38.3	34.9
WASE359	41	male	2.01	69	137	88	10.5	good	53.3	5.41	4.87	39.45	17.34	5.22	3.95	5.315	4.41	30.4	45.2	37.8	26.3	35.1	30.7
WASE361	26	female	1.33	60	113	58	11.5	good	65.2	4.21	2.85	30.96	12.06	3.07	1.95	3.64	2.4	43.9	63	53.45	34.9	51.8	43.35
WASE362	48	female	1.45	55	114	69	10.5	good	60.8	5.22	4.2	47.76	28.11	4.93	3.75	5.075	3.975	40.9	44.5	42.7	35.3	41	38.15
WASE363	26	female	1.45	72	121	66	7	poor	65.2	4.03	2.72	13.89	7.83	4.42	2.83	4.225	2.775	41.3	36.1	38.7	36.1	32	34.05
WASE364	49	female	1.52	86	117	70	6.5	poor	76.3	4.12	3.02	21.35	9.17	3.21	1.83	3.665	2.425	33.7	82.1	57.9	30.5	61.7	46.1
WASE366	45	female	1.42	76	131	87	7.5	poor	65.2	2.86	1.92	13.28	6.93	2.29	1.57	2.575	1.745	21.7	38.4	30.05	19.3	33.8	26.55
WASE367	47	female	1.54	82	129	72	9.5	so so	70.3	4.56	3.32	34.28	12.96	4.6	3.42	4.58	3.37	41.8	39.4	40.6	35.7	31.3	33.5
WASE368	45	female	1.43	78	129	82	9.5	so so	65.2	4.41	3.51	25.14	12.98	4.75	3.66	4.58	3.585	42.9	30	36.45	37.2	25.9	31.55
WASE369	64	female	1.5	69	179	113	8.5	so so	65.2	4.07	3.16	29.04	13.88	4.18	3.4	4.125	3.28	36.8	26.6	31.7	31.9	23.7	27.8
WASE370	36	female	1.46	64	125	70	7	poor	70.3	2.78	1.47	15.17	3.83	2.52	1.41	2.65	1.44	87.5	57.6	72.55	70.3	45.7	58
WASE371	62	male	1.93	54	125	81	6	extremely poor	65.2	5.14	4.07	58.62	32.13	5.36	4.42	5.25	4.245	22.8	23.3	23.05	19	21.9	20.45
WASE372	32	female	1.67	57	112	74	9.5	so so	70.3	4.01	3.56	24.8	13.76	4.75	3.53	4.38	3.545	29.2	30.9	30.05	26.6	25.9	26.25
WASE373	57	female	1.67	61	117	75	9	so so	60.8	5.16	3.89	53.18	20.54	4.79	3.93	4.975	3.91	37.1	42.4	39.75	32	34.9	33.45
WASE374	30	male	1.75	59	116	68	11	good	56.9	6.08	4.5	27.18	10.07	5.13	3.75	5.605	4.125	36.7	35.7	36.2	33.8	32.5	33.15
WASE375	29	male	1.8	66	135	77	9.5	so so	53.3	4.8	3.48	30.58	12.71	4.37	3.43	4.585	3.455	33	36.6	34.8	28.9	31.3	30.1
WASE376	23	male	1.85	58	128	84	12	good	53.3	5.86	4.1	51.44	25.02	5.58	3.94	5.72	4.02	50.6	49.9	50.25	43.6	43.3	43.45
WASE377	30	male	1.87	59	135	84	9	so so	60.8	5.47	4.6	44.66	28.49	4.68	3.79	5.075	4.195	26.6	34.1	30.35	23.1	29.4	26.25
WASE378	35	female	1.47	64	127	72	10	so so	65.2	4.54	3.44	47.08	18.28	3.72	2.69	4.13	3.065	54.7	74.8	64.75	47.3	58.9	53.1
WASE379	21	female	1.51	84	133	73	10.5	good	65.2	4.18	3.05	23.46	10.06	4.02	2.88	4.1	2.965	51.2	36.6	43.9	45	32.3	38.65
WASE380	25	female	1.52	64	127	76	8.5	so so	65.2	5.21	4.17	48.53	22.25	4.28	2.96	4.745	3.565	30.3	69	49.65	26.1	58.5	42.3
WASE381	30	female	1.63	65	136	85	10.5	good	60.8	5.19	3.89	46.59	18.29	3.88	2.79	4.535	3.34	64.3	82.1	73.2	55.8	67.4	61.6
WASE382	79	male	1.69	55	145	76	7.5	poor	65.2	4.66	3.56	39.82	12.56	4.13	2.73	4.395	3.145	28.5	57.8	43.15	25.1	51.6	38.35
WASE383	52	male	1.79	72	116	76	8.5	so so	60.4	4.07	2.99	25.24	7.68	3.81	2.68	3.94	2.835	38.5	42.7	40.6	31	35.6	33.3
WASE384	37	male	1.89	67	126	77	9	so so	56.7	4.13	3.18	27.74	14.5	4.67	3.49	4.4	3.335	36.3	45.7	41	32.4	38.3	35.35
WASE385	47	male	1.73	65	125	70	10.5	good	53.3	4.76	3.8	32.33	13.65	4.65	3.82	4.705	3.81	40.9	34.7	37.8	34.5	30.9	32.7
WASE386	51	male	1.78	70	137	84	9.5	so so	60.8	5.16	3.61	40.12	13.83	5.27	3.79	5.215	3.7	37	33.7	35.35	30.9	31.1	31
WASE387	48	female	1.77	70	122	58	11	good	65.2	5.45	4.01	70.88	31.23	5.05	3.85	5.25	3.93	36.4	40.7	38.55	32.3	33.7	33
WASE388	58	male	1.66	66	130	82	10	so so	65.2	4.79	4.71	31.92	22.94	5.01	4.56	4.9	4.635	33.8	40.8	37.3	29.2	33.8	31.5
WASE389	55	female	1.51	52	116	68	8.5	so so	65.2	4.89	3.49	50.8	17.27	4.94	3.61	4.915	3.55	37.5	41.1	39.3	32.6	33.7	33.15
WASE390	30	female	1.55	56	118	60	8.5	so so	60.8	4.62	3.4	25.87	10.69	4.06	2.73	4.34	3.065	41.8	49	45.4	37	40.7	38.85
WASE391	29	male	1.72	70	137	68	11.5	good	70.3	4.46	3.05	24.87	9	3.9	3.04	4.18	3.045	37.5	40.3	38.9	30.6	34.2	32.4
WASE392	66	female	1.57	62	138	84	8.5	so so	70.3	5.08	4.13	43.24	23.95	5.27	4.33	5.175	4.23	20.3	36	28.15	19.1	29.2	24.15
WASE393	41	female	1.43	70	113	69	8	poor	65.2	4.35	3.18	35.05	15.16	2.2	1	3.275	2.09	58.8	70.8	64.8	50.5	52.9	51.7
WASE394	75	male	1.7	63	127	84	8	poor	60.8	5.16	4.09	43.38	23.89	4.93	4.23	5.045	4.16	30.7	26.2	28.45	24.7	22.5	23.6
WASE395	70	female	1.55	70	133	73	4.5	extremely poor	65.2	5.23	4.19	37.51	21.72	5.05	4.27	5.14	4.23	29.1	19.5	24.3	22.5	18	20.25
WASE396	46	male	1.89	49	128	88	11.5	good	65.2	5.14	3.37	42.08	17.01	4.26	3.2	4.7	3.285	37.4	44.5	40.95	33.3	38	35.65
WASE398	44	male	1.82	86	134	81	9.5	so so	70.3	4.52	3.84	33.83	19.13	4.72	3.35	4.62	3.595	18.3	33.3	25.8	15.5	29.7	22.6
WASE399	44	female	1.61	62	133	77	7.5	poor	65.2	2.96	2.38	17.31	6.87	2.31	1.48	2.635	1.93	37.8	20.7	29.25	33.3	17.5	25.4
WASE401	57	female	1.47	81	128	70	9.5	so so	56.9	4.08	3.26	44.49	16.94	2.93	2.19	3.505	2.725	49.2	74	61.6	41.7	63.3	52.5
WASE402	61	male	1.94	58	127	75	7	poor	65.2	4.59	3.41	44.22	15.66	4.77	3.01	4.68	3.21	21.4	40.5	30.95	19	38	28.5
WASE403	71	male	1.51	68	139	95	8.5	so so	65.2	3.59	2.46	20.94	8.4	3.11	2.1	3.35	2.28	35.8	40.5	38.15	29.9	33.4	31.65
WASE404	69	female	1.8	58	124	80	7	poor	70.3	5.87	4.29	52.84	19.39	5.51	4.35	5.69	4.32	19.9	10.8	15.35	17.7	8.6	13.15
WASE405	40	female	1.79	55	112	80	10.5	good	65.2	4.78	3.99	43.78	22.26	4.7	3.74	4.74	3.865	32	26.4	29.2	27.5	21.7	24.6
WASE406	42	male	1.69	60	112	72	9.5	so so	60.8	5.41	3.9	32.12	16.63	4.04	3.23	4.725	3.565	32.3	43.6	37.95	28.2	39.3	33.75
WASE407	34	female	1.8	69	125	86	7	poor	65.2	4.46	3.29	27.98	12.3	4.61	3.33	4.535	3.31	29.5	46.8	38.15	25.9	36.8	31.35
WASE408	46	female	1.69	68	129	88	5	extremely poor	65.9	4.16	3.14	25.52	10.96	4.45	2.98	4.305	3.06	36.4	15	25.7	30.6	12.4	21.5
WASE501	28	male	1.84	63	134	75	9.5	so so	49.3	4.81	3.28	41.1	17.29	4.8	3.83	4.805	3.555	30.9	26	28.45	26.4	21.7	24.05
WASE502	29	male	1.93	65	129	74	8.5	so so	49.3	4.13	3.06	53.28	18.94	4.33	3.25	4.23	3.155	65.6	51	58.3	52.5	44.1	48.3
WASE503	49	male	1.57	70	138	66	10.5	good	49.3	4.71	3.54	56.74	23.37	4.87	3.3	4.79	3.42	40.3	38.9	39.6	34.2	34.7	34.45
WASE504	39	male	1.7	82	131	80	8	poor	49.2	4.22	3.14	32.64	8.74	4.37	3.54	4.295	3.34	33.3	51.5	42.4	26.8	39	32.9
WASE505	23	male	1.66	79	134	75	7.5	poor	49.3	2.89	1.67	17.5	4.79	2.59	1.37	2.74	1.52	51.5	51.6	51.55	36.5	37.5	37
WASE506	42	male	1.99	67	133	89	7	poor	50.7	5.31	3.29	38.8	13.74	5.22	4.38	5.265	3.835	18	21.7	19.85	16.1	18.6	17.35
WASE507	30	male	1.83	67	129	71	11.5	good	49.3	4.57	3.43	37.55	12.29	4.41	2.83	4.49	3.13	60.2	67.4	63.8	46.7	59.3	53
WASE508	26	male	1.75	58	132	80	11.5	good	49.3	4.65	3.43	27.53	14.61	4.28	2.84	4.465	3.135	40.5	47.3	43.9	33.8	38.5	36.15
WASE509	44	female	1.61	67	127	78	9	so so	52.6	4.86	3.63	23.57	11.56	4.9	3.95	4.88	3.79	37.6	48.3	42.95	31.9	41.3	36.6
WASE510	27	female	1.57	59	106	64	8	poor	52.6	4.55	3.83	47.81	28.47	4.68	3.6	4.615	3.715	32.3	42.7	37.5	27.5	36.6	32.05
WASE511	22	female	1.43	77	120	71	10.5	good	52.6	4.21	2.8	43.07	15.19	3.91	2.87	4.06	2.835	64.1	44.1	54.1	49.9	36.1	43
WASE512	23	male	1.78	53	130	72	9	so so	49.3	5	3.68	40.58	16.35	5.15	3.59	5.075	3.635	46.5	31.5	39	40	27.4	33.7
WASE513	51	male	1.92	72	121	90	11	good	49.3	5.16	4.06	41.19	16.68	4.79	3.63	4.975	3.845	33	43.1	38.05	30.7	35.6	33.15
WASE514	33	male	2.11	45	124	72	10	so so	49.3	4.87	3.43	51.33	20.57	5.24	3.83	5.055	3.63	51.1	45.5	48.3	45	39	42
WASE515	46	male	2.08	74	132	83	10.5	good	49.3	4.72	3.43	52.35	15.58	4.91	3.6	4.815	3.515	57.4	38.4	47.9	48.9	32.3	40.6
